# Supplementary figures and images for: Fabrication and characterization of a novel fluffy polypyrrole fibrous scaffold designed for 3D cell culture
Source: Royal Society of Chemistry journal article supplement (doi:10.1039/c2jm32165c), 2012-01-01

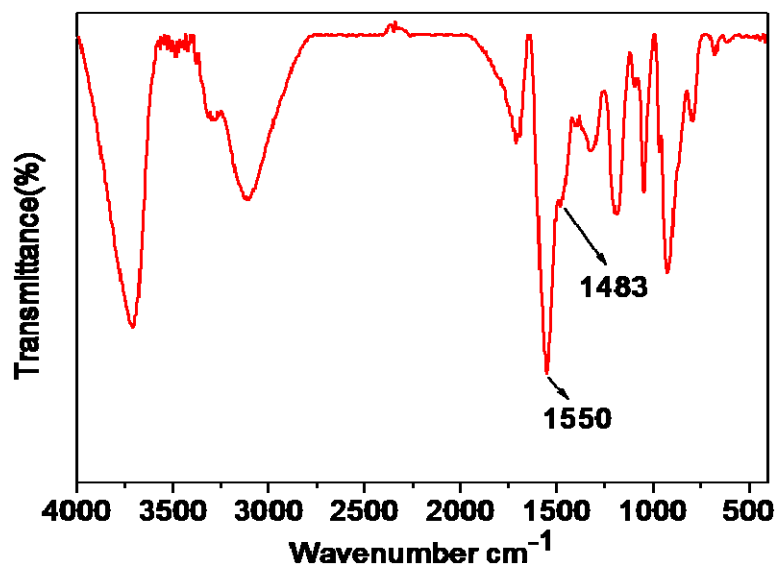

Figure S1. FTIR spectra of 3D fluffy-PPy scaffolds.

Supplement: c2jm32165c.pdf [file c2jm32165c.pdf]
